# Supplementary material for: No detectable effect of RNA-binding protein Hfq absence in Staphylococcus aureus
Source: PubMed Central journal article supplement (PMC1800855; doi:10.1186/1471-2180-7-10), 2007-02-09
Supplement: 1471-2180-7-10-S1.pdf [file 1471-2180-7-10-S1.pdf]

| PHENOTYPE MICROARRAY (PM)- No | WELL        | VALUE | SUBSTRATE                     | MODE OF ACTION                                 |
|-------------------------------|-------------|-------|-------------------------------|------------------------------------------------|
| <b>Phenotypes Gained:</b>     |             |       |                               |                                                |
| PM20B                         | E07         | 95    | Dodine                        | fungicide, guanidine, membrane permeability    |
| PM15B                         | D06         | 74    | Domiphen bromide              | membrane, detergent, cationic, fungicide       |
| PM18C                         | A10,A11,A12 | 434   | Thiampenicol                  | protein synthesis                              |
| PM11C                         | F03,F04     | 212   | Chloramphenicol               | protein synthesis                              |
| PM14A                         | F04         | 61    | Chloramphenicol               | protein synthesis                              |
| PM19                          | B10         | 130   | 2,4-Dinitrophenol             | respiration, ionophore, H+                     |
| <b>Phenotypes Lost:</b>       |             |       |                               |                                                |
| PM17A                         | A07,A08     | -150  | b-Chloro-L-Alanine            | aa analog, alanine, aminotransferase inhibitor |
| PM18C                         | A02         | -87   | Ketoprofen                    | anti-capsule                                   |
| PM01                          | G04         | -142  | L-Threonine                   | C-source                                       |
| PM02A                         | G05         | -105  | Glycine                       | C-source                                       |
| PM01                          | D10         | -78   | Lactulose                     | C-source                                       |
| PM01                          | A03         | -75   | N-Acetyl-D-Glucosamine        | C-source                                       |
| PM01                          | D09         | -70   | a-D-Lactose                   | C-source                                       |
| PM01                          | E07         | -66   | a-Hydroxy-Butyric Acid        | C-source                                       |
| PM01                          | C04         | -54   | D-Ribose                      | C-source                                       |
| PM14A                         | B08         | -126  | Fusaric Acid                  | chelator, lipophilic                           |
| PM19                          | H04         | -172  | Hexaminecobalt (III) Chloride | DNA synthesis                                  |
| PM19                          | D03,D04     | -184  | Disulphiram                   | fungicide                                      |
| PM06                          | B07         | -175  | Arg-Asp                       | N-source                                       |
| PM08                          | E08         | -161  | Val-Glu                       | N-source                                       |
| PM06                          | D07         | -155  | Glu-Asp                       | N-source                                       |
| PM08                          | D10         | -154  | Ser-Glu                       | N-source                                       |
| PM06                          | D10         | -146  | Glu-Ser                       | N-source                                       |
| PM07                          | B09         | -145  | Met-Gln                       | N-source                                       |
| PM03B                         | E06         | -143  | Glucuronamide                 | N-source                                       |
| PM06                          | H07         | -141  | Leu-Glu                       | N-source                                       |
| PM03B                         | E10         | -138  | D-Mannosamine                 | N-source                                       |
| PM08                          | E07         | -136  | Val-Gln                       | N-source                                       |
| PM06                          | D08         | -134  | Glu-Glu                       | N-source                                       |
| PM06                          | E01         | -132  | Glu-Val                       | N-source                                       |
| PM06                          | H06         | -125  | Leu-Asp                       | N-source                                       |
| PM06                          | A06         | -123  | Ala-Glu                       | N-source                                       |
| PM08                          | D08         | -122  | Ser-Asp                       | N-source                                       |
| PM06                          | C07         | -118  | Asn-Glu                       | N-source                                       |
| PM08                          | A09         | -117  | Asp-Gln                       | N-source                                       |
| PM08                          | F03         | -113  | b-Ala-Gly                     | N-source                                       |
| PM07                          | B08         | -105  | Met-Asp                       | N-source                                       |
| PM07                          | D06         | -104  | Pro-Gln                       | N-source                                       |
| PM03B                         | H01         | -103  | Ala-Asp                       | N-source                                       |
| PM06                          | A02         | -103  | L-Glutamine                   | N-source                                       |
| PM08                          | A02         | -101  | L-Glutamine                   | N-source                                       |
| PM03B                         | B01         | -99   | L-Glutamine                   | N-source                                       |
| PM07                          | G07         | -99   | Tyr-Glu                       | N-source                                       |
| PM07                          | A02         | -99   | L-Glutamine                   | N-source                                       |
| PM07                          | B10         | -96   | Met-Glu                       | N-source                                       |
| PM03B                         | A12         | -96   | L-Glutamic Acid               | N-source                                       |
| PM03B                         | E07         | -94   | D,L-Lactamide                 | N-source                                       |
| PM06                          | E04         | -89   | Gly-Cys                       | N-source                                       |
| PM03B                         | A05         | -89   | Urea                          | N-source                                       |
| PM08                          | A11         | -89   | Glu-Ala                       | N-source                                       |
| PM08                          | A08         | -88   | Asp-Ala                       | N-source                                       |
| PM08                          | F05         | -87   | Met-b-Ala                     | N-source                                       |
| PM06                          | F05         | -82   | His-Asp                       | N-source                                       |
| PM03B                         | A09         | -82   | L-Asparagine                  | N-source                                       |
| PM06                          | C09         | -78   | Asp-Asp                       | N-source                                       |
| PM08                          | A03         | -77   | Ala-Asp                       | N-source                                       |
| PM03B                         | H03         | -77   | Ala-Glu                       | N-source                                       |
| PM03B                         | E09         | -75   | D-Galactosamine               | N-source                                       |
| PM06                          | H11         | -75   | Leu-Met                       | N-source                                       |
| PM08                          | B06         | -75   | Ile-Asn                       | N-source                                       |
| PM06                          | F07         | -72   | His-Leu                       | N-source                                       |
| PM06                          | H05         | -72   | Leu-Arg                       | N-source                                       |

| PHENOTYPE MICROARRAY<br>(PM)- No | WELL | VALUE | SUBSTRATE                                   | MODE OF ACTION       |
|----------------------------------|------|-------|---------------------------------------------|----------------------|
| <b>Phenotypes Lost(cont'd):</b>  |      |       |                                             |                      |
| PM07                             | B06  | -70   | Lys-Val                                     | N-source             |
| PM08                             | G08  | -69   | Leu-b-Ala                                   | N-source             |
| PM06                             | B08  | -66   | Arg-Gln                                     | N-source             |
| PM07                             | C02  | -65   | Met-Leu                                     | N-source             |
| PM07                             | A04  | -65   | Leu-Trp                                     | N-source             |
| PM07                             | F09  | -62   | Trp-Glu                                     | N-source             |
| PM06                             | G05  | -61   | Ile-Gln                                     | N-source             |
| PM06                             | D03  | -60   | Asp-Val                                     | N-source             |
| PM07                             | H05  | -60   | Val-Asp                                     | N-source             |
| PM08                             | G05  | -59   | Gly-D-Ser                                   | N-source             |
| PM06                             | D12  | -59   | Glu-Tyr                                     | N-source             |
| PM06                             | C06  | -57   | Arg-Val                                     | N-source             |
| PM08                             | E10  | -57   | Val-Met                                     | N-source             |
| PM03B                            | H12  | -56   | Met-Ala                                     | N-source             |
| PM08                             | C12  | -54   | Pro-Asn                                     | N-source             |
| PM06                             | C01  | -53   | Arg-Met                                     | N-source             |
| PM03B                            | H06  | -52   | Ala-Leu                                     | N-source             |
| PM06                             | D05  | -51   | Gln-Gln                                     | N-source             |
| PM07                             | F05  | -51   | Thr-Pro                                     | N-source             |
| PM03B                            | H05  | -51   | Ala-His                                     | N-source             |
| PM05                             | B10  | -125  | Guanine                                     | nutrient stimulation |
| PM05                             | G06  | -118  | Inosine + Thiamine                          | nutrient stimulation |
| PM05                             | C10  | -116  | Hypoxanthine                                | nutrient stimulation |
| PM05                             | C12  | -115  | 2'-Deoxy-Inosine                            | nutrient stimulation |
| PM05                             | B12  | -110  | 2'-Deoxy-Guanosine                          | nutrient stimulation |
| PM05                             | C11  | -104  | Inosine                                     | nutrient stimulation |
| PM05                             | G11  | -101  | Menadione                                   | nutrient stimulation |
| PM05                             | D05  | -100  | L-Homoserine<br>Lactone                     | nutrient stimulation |
| PM05                             | D03  | -93   | Chorismic Acid                              | nutrient stimulation |
| PM05                             | A06  | -91   | L-Aspartic Acid                             | nutrient stimulation |
| PM05                             | B11  | -91   | Guanosine                                   | nutrient stimulation |
| PM05                             | A08  | -90   | L-Glutamic Acid                             | nutrient stimulation |
| PM05                             | A04  | -88   | L-Arginine                                  | nutrient stimulation |
| PM05                             | G10  | -88   | Pyrrolo-Quinoline<br>Quinone                | nutrient stimulation |
| PM05                             | E10  | -88   | Uracil                                      | nutrient stimulation |
| PM05                             | B09  | -85   | Guanosine-3',5'-<br>Cyclic<br>Monophosphate | nutrient stimulation |
| PM05                             | C06  | -85   | L-Valine                                    | nutrient stimulation |
| PM05                             | A07  | -83   | L-Cysteine                                  | nutrient stimulation |
| PM05                             | A05  | -83   | L-Asparagine                                | nutrient stimulation |
| PM05                             | D06  | -83   | D-Alanine                                   | nutrient stimulation |
| PM05                             | C05  | -82   | L-Tyrosine                                  | nutrient stimulation |
| PM05                             | D04  | -81   | Shikimic Acid (-)                           | nutrient stimulation |
| PM05                             | E11  | -80   | Uridine                                     | nutrient stimulation |
| PM05                             | C07  | -80   | L-Isoleucine + L-<br>Valine                 | nutrient stimulation |
| PM05                             | E06  | -80   | Pyridoxamine                                | nutrient stimulation |
| PM05                             | D08  | -79   | D-Glutamic Acid                             | nutrient stimulation |
| PM05                             | A01  | -79   | Negative Control                            | nutrient stimulation |
| PM05                             | B08  | -79   | L-Phenylalanine                             | nutrient stimulation |
| PM05                             | C04  | -79   | L-Tryptophan                                | nutrient stimulation |
| PM05                             | C02  | -78   | L-Serine                                    | nutrient stimulation |
| PM05                             | D11  | -78   | Cytidine                                    | nutrient stimulation |
| PM05                             | D10  | -77   | Cytosine                                    | nutrient stimulation |
| PM05                             | D12  | -77   | 2'-Deoxy-Cytidine                           | nutrient stimulation |
| PM05                             | E08  | -77   | D-Pantothenic Acid                          | nutrient stimulation |
| PM05                             | D02  | -77   | L-Citrulline                                | nutrient stimulation |
| PM05                             | C08  | -76   | 4-Hydroxy L-<br>Proline (trans)             | nutrient stimulation |
| PM05                             | D09  | -76   | D,L-Diamino-<br>Pimelic Acid                | nutrient stimulation |
| PM05                             | A03  | -75   | L-Alanine                                   | nutrient stimulation |
| PM05                             | B02  | -75   | Glycine                                     | nutrient stimulation |
| PM05                             | D07  | -75   | D-Aspartic Acid                             | nutrient stimulation |
| PM05                             | C01  | -75   | L-Proline                                   | nutrient stimulation |

| PHENOTYPE MICROARRAY (PM)- No   | WELL    | VALUE | SUBSTRATE                            | MODE OF ACTION                  |
|---------------------------------|---------|-------|--------------------------------------|---------------------------------|
| <b>Phenotypes Lost(cont'd):</b> |         |       |                                      |                                 |
| PM05                            | A09     | -74   | Adenosine-3',5'-Cyclic Monophosphate | nutrient stimulation            |
| PM05                            | B01     | -74   | L-Glutamine                          | nutrient stimulation            |
| PM05                            | D01     | -74   | L-Ornithine                          | nutrient stimulation            |
| PM05                            | E04     | -74   | Pyridoxine                           | nutrient stimulation            |
| PM05                            | F09     | -73   | N-Acetyl D-Glucosamine               | nutrient stimulation            |
| PM05                            | E12     | -73   | 2'-Deoxy-Uridine                     | nutrient stimulation            |
| PM05                            | F10     | -73   | Thymine                              | nutrient stimulation            |
| PM05                            | F08     | -73   | D-(+)-Glucose                        | nutrient stimulation            |
| PM05                            | E07     | -72   | b-Alanine                            | nutrient stimulation            |
| PM05                            | E09     | -72   | Orotic Acid                          | nutrient stimulation            |
| PM05                            | F06     | -72   | Hematin                              | nutrient stimulation            |
| PM05                            | F04     | -72   | b-Nicotinamide Adenine Dinucleotide  | nutrient stimulation            |
| PM05                            | F05     | -69   | d-Amino-Levulinic Acid               | nutrient stimulation            |
| PM05                            | B06     | -68   | L-Lysine                             | nutrient stimulation            |
| PM05                            | G04     | -68   | p-Amino-Benzoic Acid                 | nutrient stimulation            |
| PM05                            | B05     | -67   | L-Leucine                            | nutrient stimulation            |
| PM05                            | A10     | -66   | Adenine                              | nutrient stimulation            |
| PM05                            | G08     | -65   | Thiamine Pyrophosphate               | nutrient stimulation            |
| PM05                            | F03     | -65   | Nicotinamide                         | nutrient stimulation            |
| PM05                            | G05     | -64   | Folic Acid                           | nutrient stimulation            |
| PM05                            | G01     | -64   | Oxaloacetic Acid                     | nutrient stimulation            |
| PM05                            | F02     | -64   | Nicotinic Acid                       | nutrient stimulation            |
| PM05                            | F11     | -64   | Glutathione (reduced form)           | nutrient stimulation            |
| PM05                            | E01     | -64   | Putrescine                           | nutrient stimulation            |
| PM05                            | B04     | -63   | L-Isoleucine                         | nutrient stimulation            |
| PM05                            | F07     | -63   | Deferoxamine Mesylate                | nutrient stimulation            |
| PM05                            | E02     | -62   | Spermidine                           | nutrient stimulation            |
| PM05                            | G03     | -61   | Cyano-Cobalamine                     | nutrient stimulation            |
| PM05                            | G09     | -60   | Riboflavin                           | nutrient stimulation            |
| PM05                            | G02     | -60   | D-Biotin                             | nutrient stimulation            |
| PM05                            | H05     | -58   | D,L-a-Lipoic Acid (oxidized form)    | nutrient stimulation            |
| PM05                            | H08     | -58   | Choline                              | nutrient stimulation            |
| PM05                            | F01     | -58   | Quinolinic Acid                      | nutrient stimulation            |
| PM05                            | H06     | -58   | D,L-Mevalonic Acid                   | nutrient stimulation            |
| PM05                            | H07     | -57   | D,L-Carnitine                        | nutrient stimulation            |
| PM05                            | H10     | -56   | Tween 40                             | nutrient stimulation            |
| PM05                            | B07     | -55   | L-Methionine                         | nutrient stimulation            |
| PM05                            | G07     | -55   | Thiamine                             | nutrient stimulation            |
| PM05                            | H04     | -55   | Caprylic Acid                        | nutrient stimulation            |
| PM05                            | E05     | -50   | Pyridoxal                            | nutrient stimulation            |
| PM12B                           | B05     | -98   | Penimepicycline                      | protein synthesis, tetracycline |
| PM13B                           | G03     | -116  | Cobalt chloride                      | toxic cation                    |
| PM16A                           | A03,A04 | -141  | Cefotaxime                           | wall, cephalosporin             |

Table 1: Phenotypes gained or lost of RN6390 *hfq* mutant
